# Supplementary material for: MicroRNA-126 induces autophagy by altering cell metabolism in malignant mesothelioma
Source: PubMed Central journal article supplement (PMC5095004; doi:10.18632/oncotarget.8916), 2016-04-22
Supplement: oncotarget-07-36338-s001.pdf [file oncotarget-07-36338-s001.pdf]

SUPPLEMENTARY FIGURES

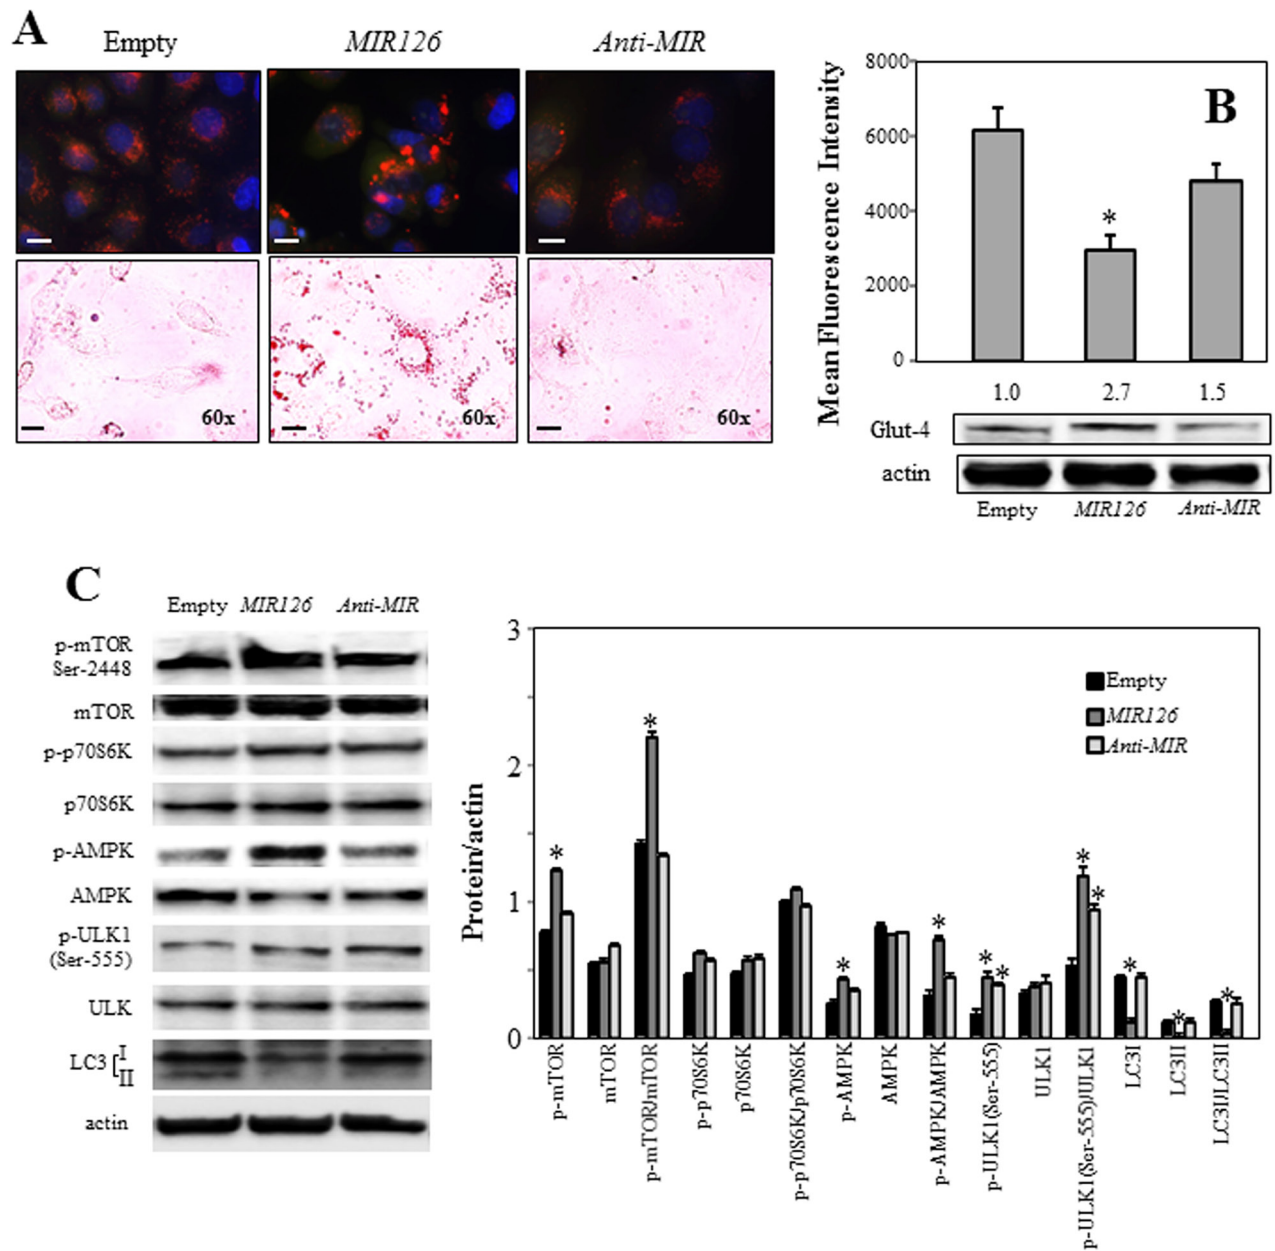

**Supplementary Figure S1: H28 cells transfected with empty plasmid-, *MIR126*, and *MIR126* together with antisense *MIR126* (*anti-MIR*) were evaluated for A. acid vesicle (AV) (acridine orange staining, upper panels), lipid droplet (LD) (Oil Red O staining, lower panels) formation; B. Glucose uptake and GLUT-4 expression; C. levels of p-mTOR, mTOR and p-p70S6K, p70S6K, p-AMPK, AMPK, p-ULK1 (Ser555), ULK1, LC3I, and LC3II. Densitometric evaluation of the bands is shown relative to actin (right panels). The data shown are mean values  $\pm$  S.D. derived from five independent experiments. The symbol “\*” indicates significant differences compared with empty plasmid-transfected cells.**

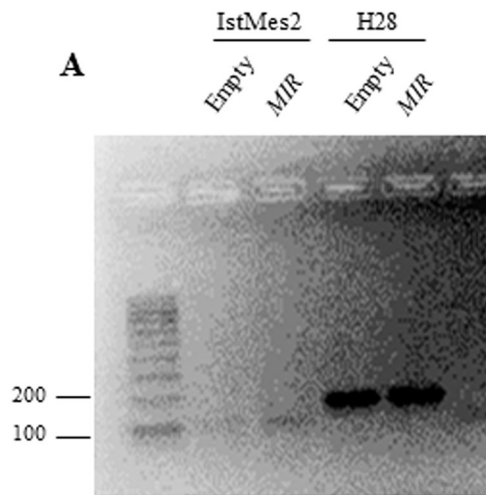

**B**

|                                       |                                                                                                       |
|---------------------------------------|-------------------------------------------------------------------------------------------------------|
| <i>MIR126</i>                         | <b>GAGTAGTCAT</b>                                                                                     |
|                                       |                                                                                                       |
| <i>IRS1 3' UTR</i> <sup>H28</sup>     | <b>CTCATCAGTAGATGGTACGA</b> TGCATCCATTTCAGTTTGTCTTACTTTATCCAATCCTCAG<br>GATTCATTGACTGAACTGCACGTTCTA   |
| <i>IRS1 3' UTR</i> <sup>IstMes2</sup> | <u>CTCATCAGTAGATGGTACGA</u> TGCATCCATTTCAGTTTACTCTGTACAATCCT<br><u>CAGGAGTTCATTGACTGAACTGCACGTTCA</u> |

**Supplementary Figure S2: IstMes2 cells feature truncated IRS1.** IstMes2 lacking the *MIR126*-binding site at the 3'UTR of IRS1 as shown by PCR **A**. and sequencing analysis. **B**. The red sequence represents full *MIR126*-binding site at the 3'UTR of IRS1, which is absent in IstMes2 cells (sequence in grey).

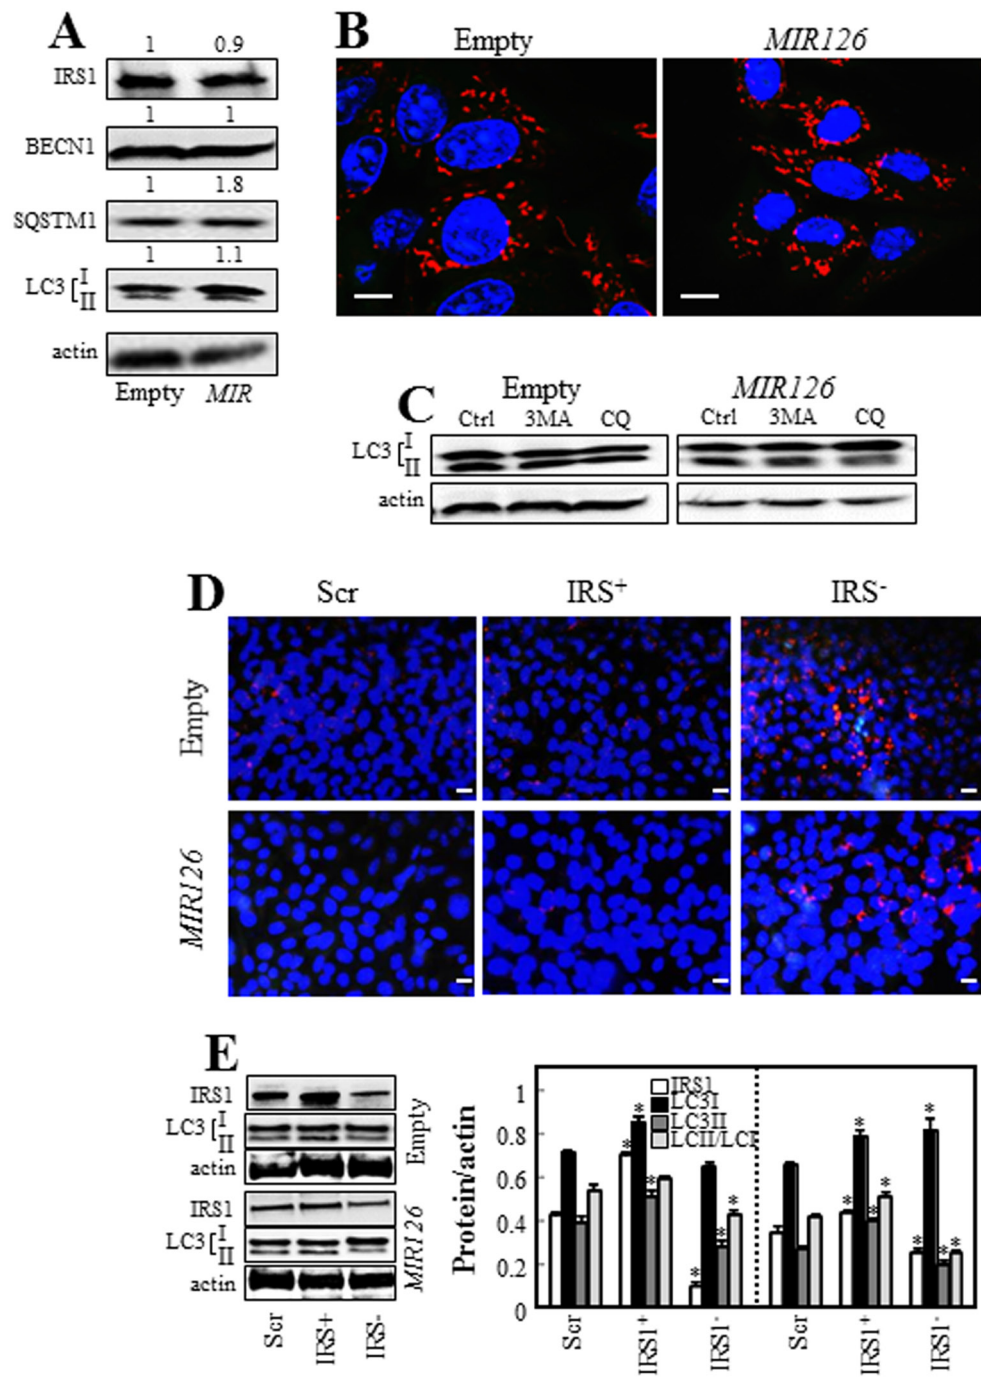

**Supplementary Figure S3: Truncated IRS1 inhibits *MIR126*-induced autophagy.** Empty plasmid- and *MIR126*-transfected IstMes2 cells with truncated IRS1 lacking the *MIR126*-binding site at the 3'UTR of IRS1, were evaluated for the expression of IRS1, BECN1, SQSTM1 and LC3I/II. Fold changes with respect to parental cells are shown **A**. Autophagy and autophagic flux were evaluated by AO staining **B**, and 3MA or CQ incubation, respectively **C**. Empty plasmid- and *MIR126*-transfected H28 cells and their IRS1-silenced (IRS1<sup>-</sup>) or IRS1-overexpressing (IRS1<sup>+</sup>) counterparts were analyzed for AV formation **D**, and for IRS1 levels and LC3 conversion **E**. Densitometric analysis of IRS1 and LC3 conversion related to actin (right panel). Scale bar for all images = 10 μm. The data shown are mean values ± S.D. derived from three independent experiments. Comparisons among groups were determined by one-way ANOVA with Tukey post-hoc analysis; the symbol “\*\*” indicates significantly different values compared with scramble control with p < 0.05.

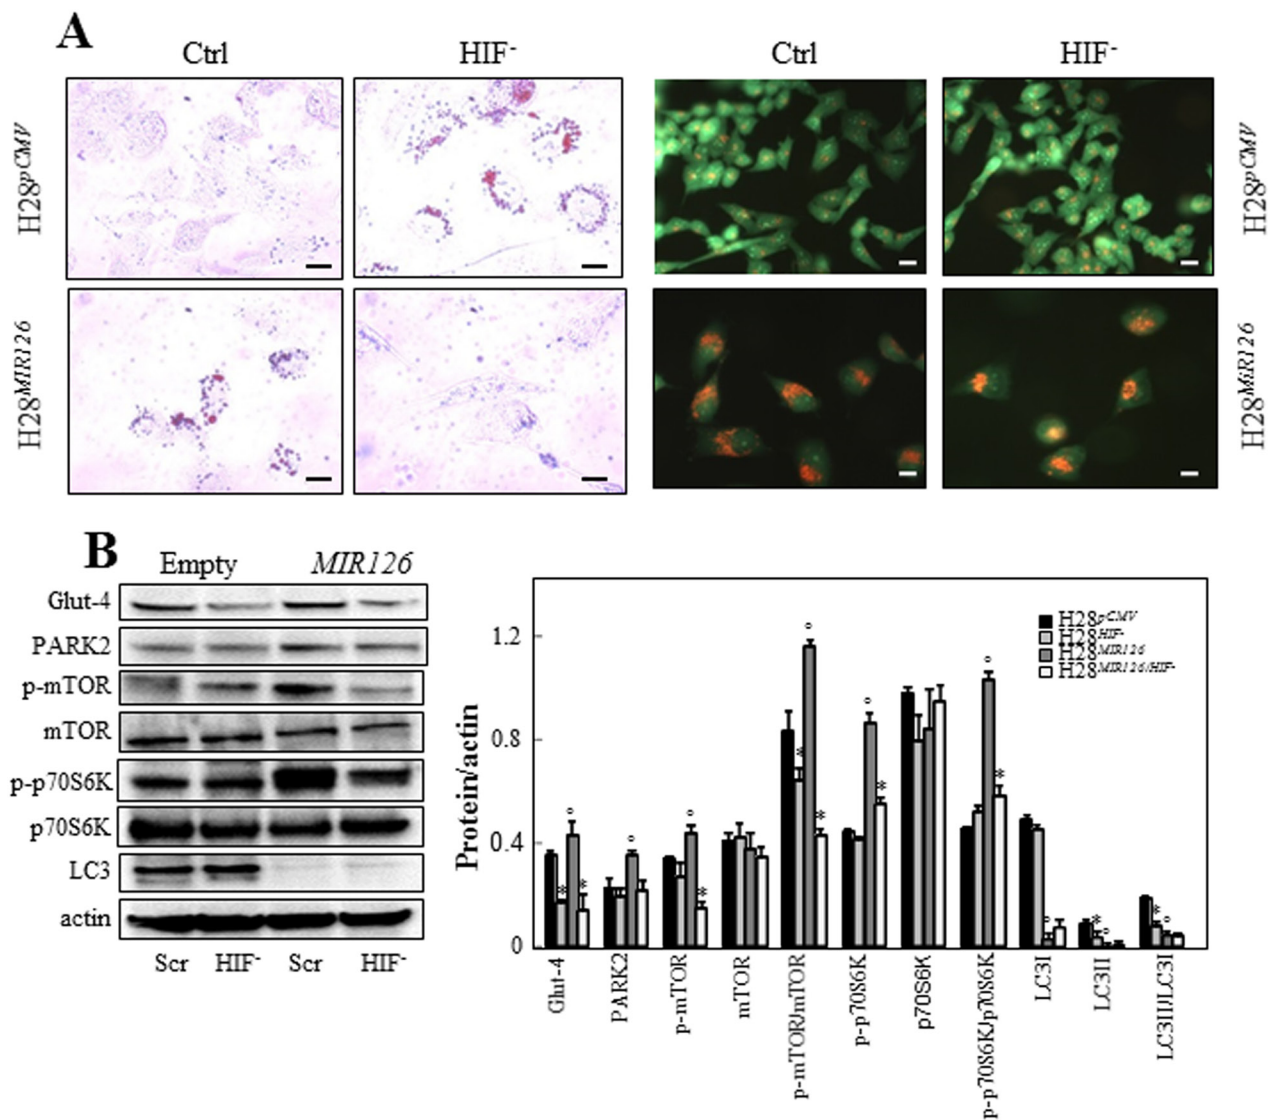

**Supplementary Figure S4: HIF1 $\alpha$  is involved in *MIR126*-induced lipid droplet formation and mitophagy.** **A.** Empty plasmid- and *MIR126*-transfected H28 cells and their HIF1 $\alpha$ -silenced (HIF<sup>-</sup>) counterparts were analyzed for LDs (Oil Red O staining, left panel) and for formation of AVs (orange-red fluorescence, right panel). **B.** Immunoblot of GLUT4, PARK2, p-mTOR, mTOR, p-p70S6K, p70S6K, and LC3. Densitometric analysis of the bands in panel B related to the level of actin is shown in the right panel. Scale bar for all images equals 10  $\mu$ m. The data shown are mean values  $\pm$  S.D. derived from three independent experiments. Comparisons among groups were determined by one-way ANOVA with Tukey post-hoc analysis; the symbol “\*” indicates significantly different values between empty-plasmid transfected cells and HIF1 $\alpha$ -silenced counterparts, and symbol “o” statistically significant difference compared with *MIR126*-transfected cells, with  $p < 0.05$ .

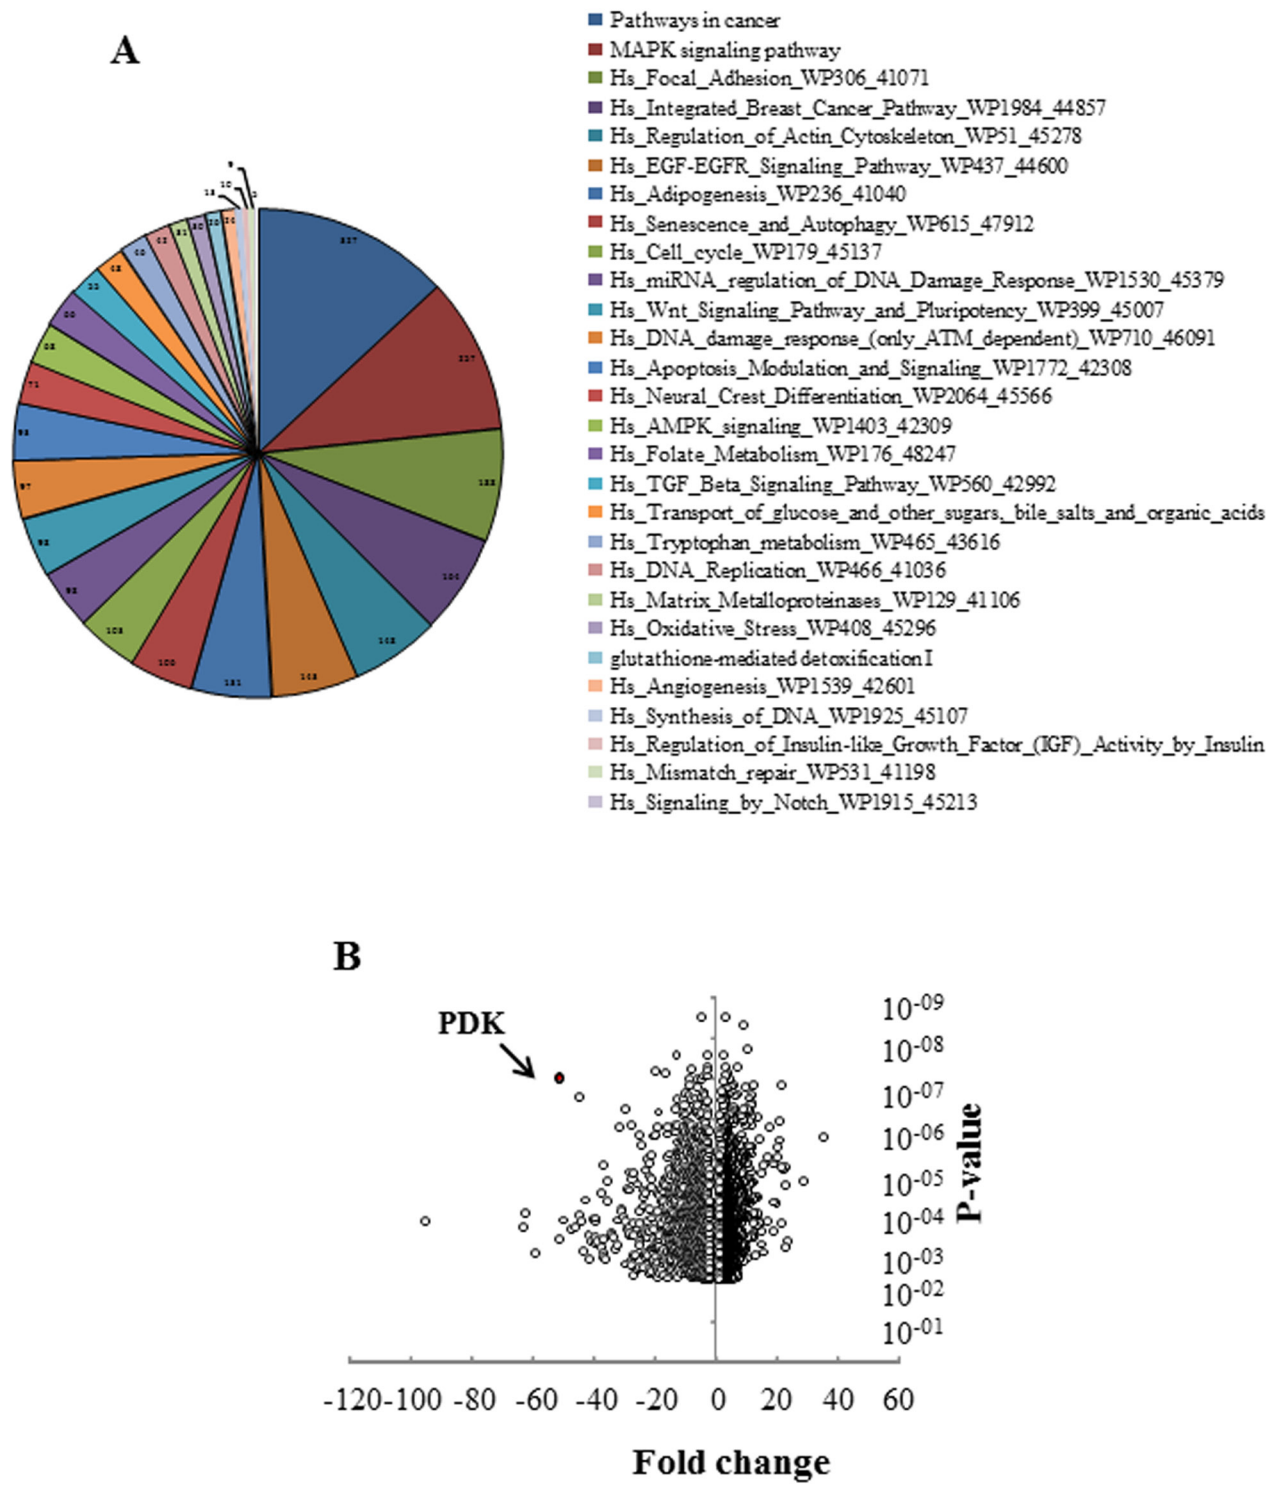

**Supplementary Figure S5: Genome-wide gene expression analysis.** **A.** Gene expression analysis was performed in *MIR126*-transfected H28 cells and their empty plasmid-transfected counterparts. Pathway enrichment analysis of *MIR126*-associated molecular signatures derived from H28 cells transfected with *MIR126* and compared with controls. **B.** Up- and downregulated genes in cells overexpressing *MIR126* with respect to empty plasmid-transfected cells were considered differentially expressed if their levels were increased or decreased by more than 2-fold, with  $p < 0.05$ . Comparisons between samples were determined by unpaired t-test, p-value computation: Asymptotic, Multiple Testing Correction: Benjamini-Hochberg.
